# Supplementary material for: Microwave-pulse synthesis of tunable 2D porous nickel-enriched LaMnxNi1−xO3 solid solution for efficient electrocatalytic urea oxidation
Source: Royal Society of Chemistry journal article supplement (doi:10.1039/d4ta00235k), 2024-01-01
Supplement: d4ta00235k1.pdf [file d4ta00235k1.pdf]

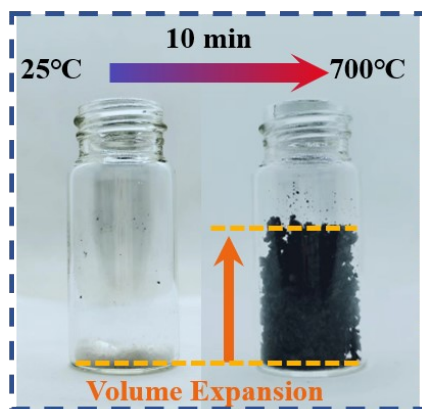

**Fig. S3** Physical-optical photographs before and after the reaction.

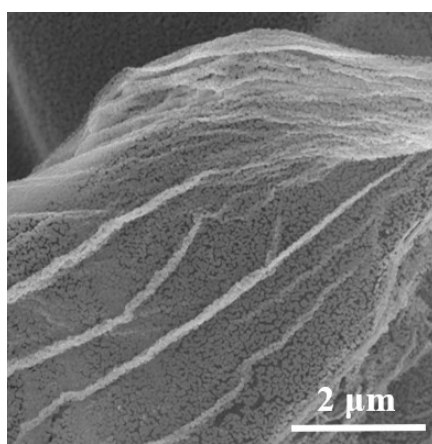

**Fig. S4** SEM image of LNO.

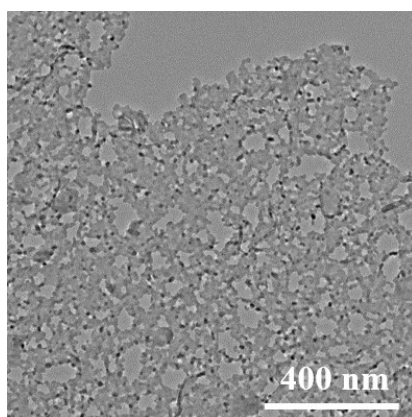

**Fig. S5** TEM image of LNO.

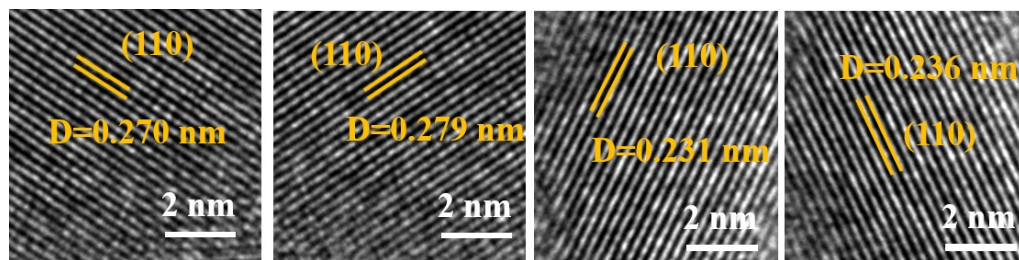

**Fig. S6** Lattice spacing of LNO , LNMO-0.4 , LNMO-0.6 , LNMO-0.8 on the (110) diffraction plane.

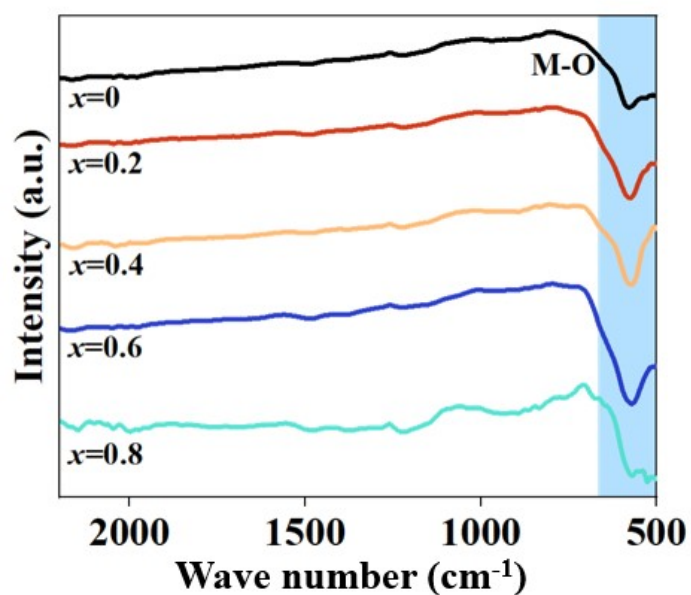

**Fig. S7** FTIR spectrums of  $\text{LaMn}_x\text{Ni}_{1-x}\text{O}_3$  ( $x=0, 0.2, 0.4, 0.6, 0.8$ ).

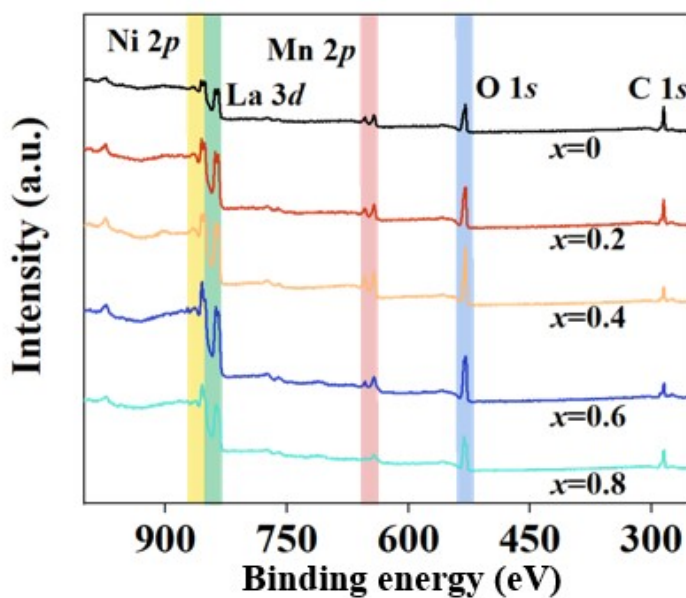

**Fig. S8** XPS survey spectrum of  $\text{LaMn}_x\text{Ni}_{1-x}\text{O}_3$  ( $x=0, 0.2, 0.4, 0.6, 0.8$ ) catalysts.

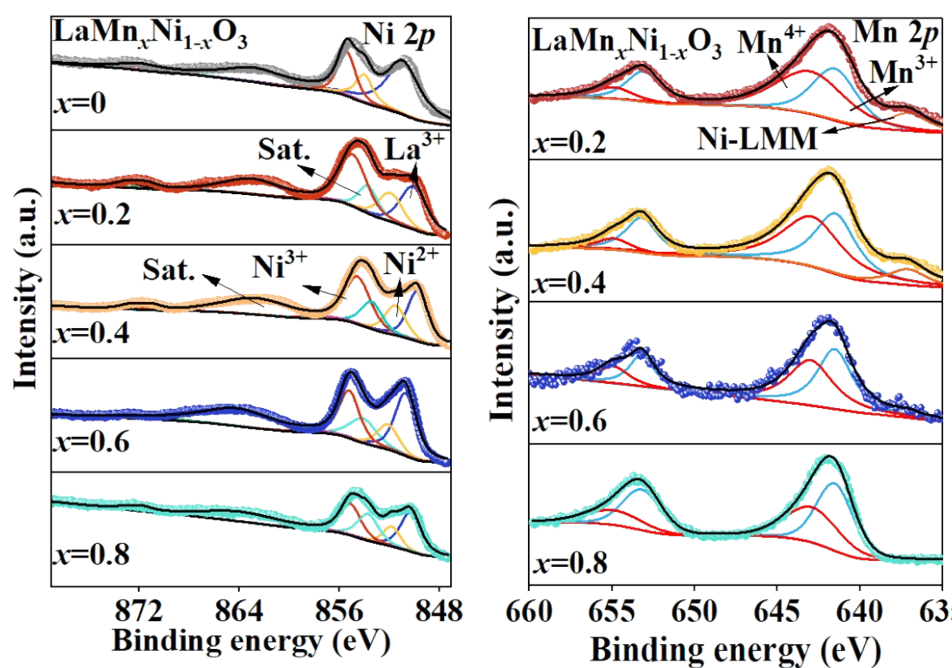

**Fig. S9** High-resolution XPS spectra of (A) Ni 2p and (B) Mn 2p features of  $\text{LaMn}_x\text{Ni}_{1-x}\text{O}_3$  ( $x=0, 0.2, 0.4, 0.6, 0.8$ ) catalysts.

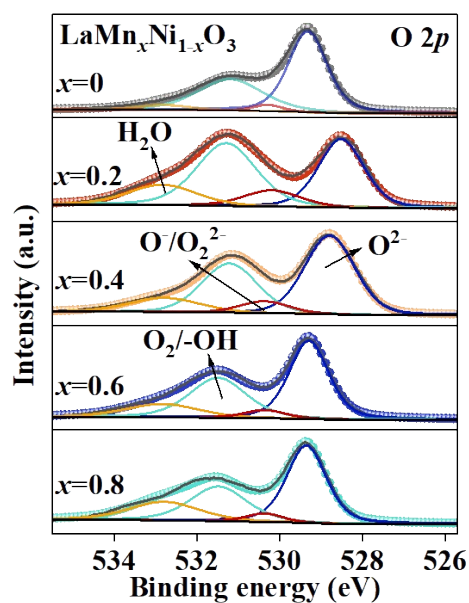

**Fig. S10** High-resolution XPS spectra of O 1s features of  $\text{LaMn}_x\text{Ni}_{1-x}\text{O}_3$  ( $x=0, 0.2, 0.4, 0.6, 0.8$ ) catalysts.

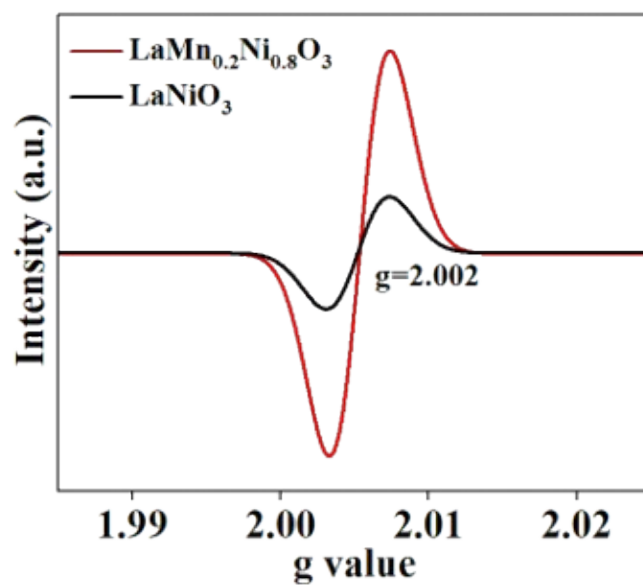

Fig. S11. EPR spectra of LNMO-0.2 and LNO.

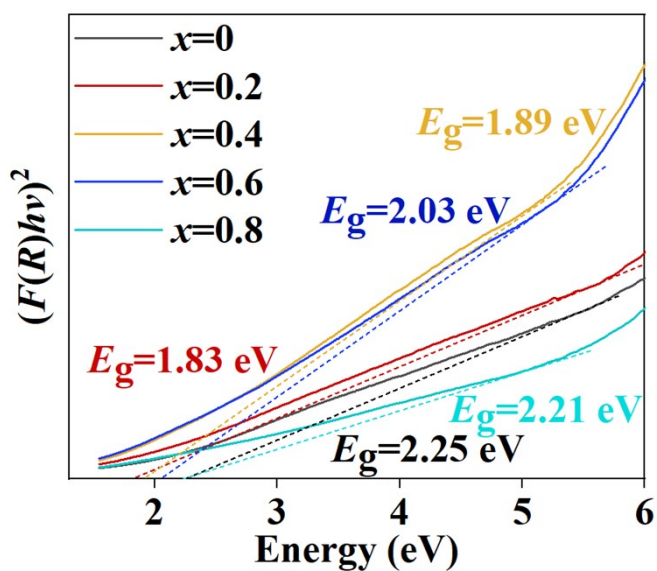

Fig. S12 Bandgap of  $\text{LaMn}_x\text{Ni}_{1-x}\text{O}_3$  ( $x=0, 0.2, 0.4, 0.6, 0.8$ ) catalysts.

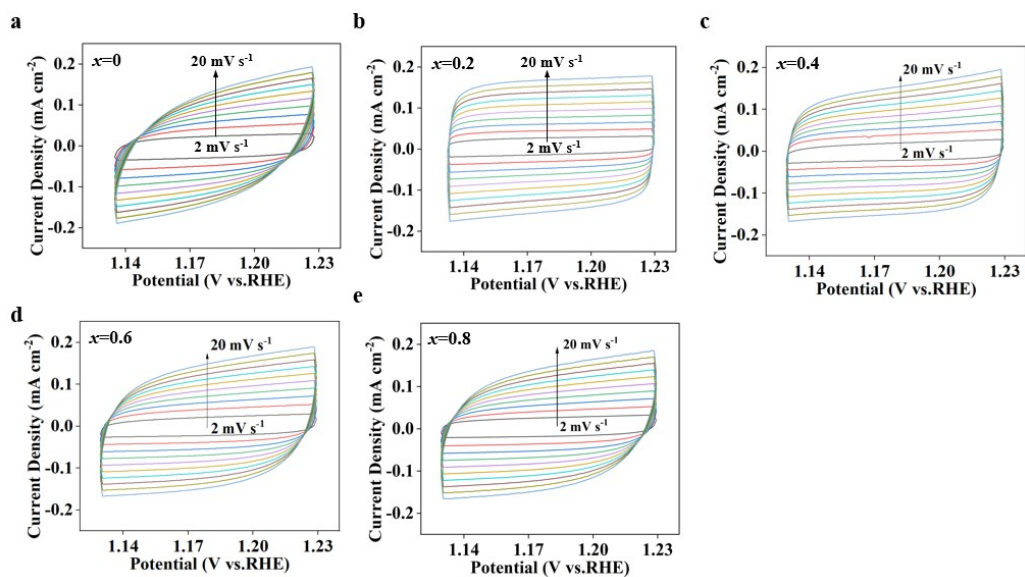

**Fig. S13** CV measurements in a non-faradic current region (1.13-1.23 V) at scan rates of 2 to 20  $\text{mV s}^{-1}$  of (a)  $\text{LaNiO}_3$ , (b)  $\text{LaMn}_{0.2}\text{Ni}_{0.8}\text{O}_3$ , (c)  $\text{LaMn}_{0.4}\text{Ni}_{0.6}\text{O}_3$ , (d)  $\text{LaMn}_{0.6}\text{Ni}_{0.4}\text{O}_3$  and (e)  $\text{LaMn}_{0.8}\text{Ni}_{0.2}\text{O}_3$  in  $\text{N}_2$ -saturated 1.0 M KOH and 0.33 M urea solution.

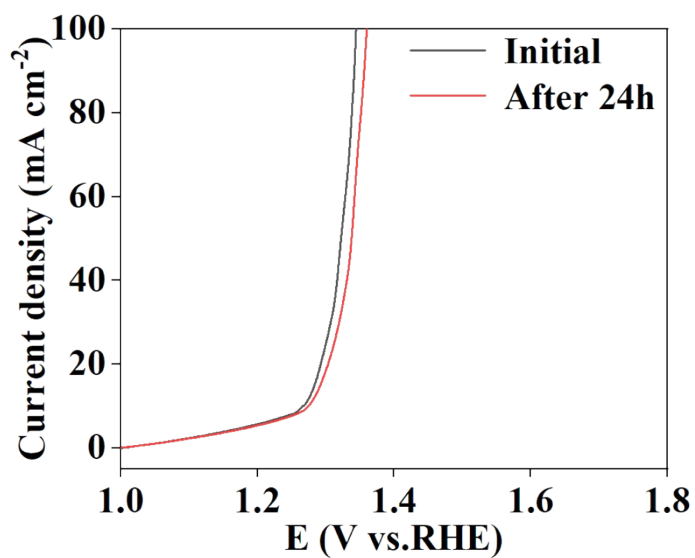

**Fig. S14** The durability tests of LNMO-0.2 catalysts.

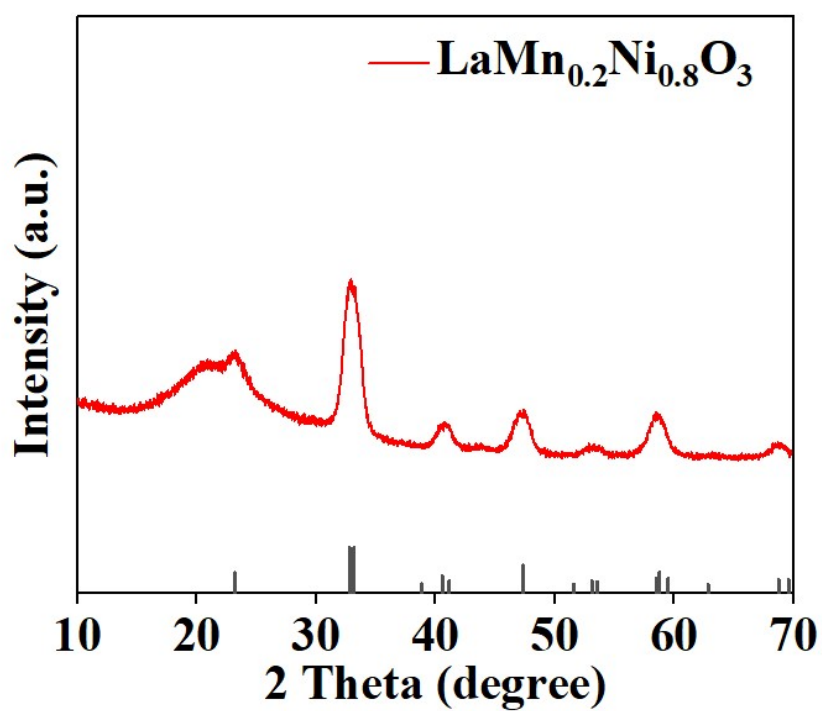

Fig.S15 XRD images of LNMO-0.2 after durability tests.

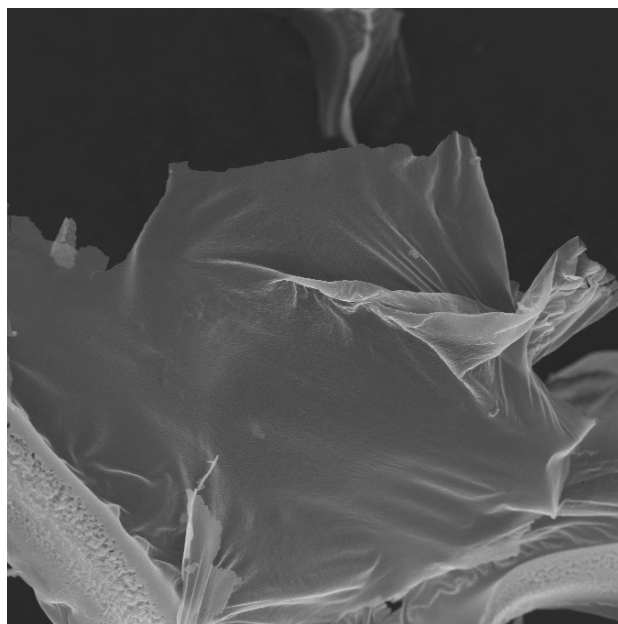

Fig. S16 SEM images of LNMO-0.2 catalysts after durability tests.

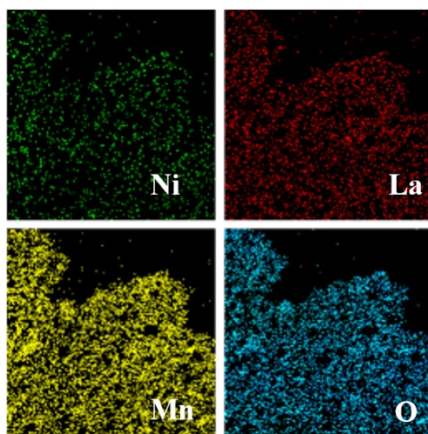

**Fig. S17** EDS images of LNMO-0.2 catalysts after durability tests.

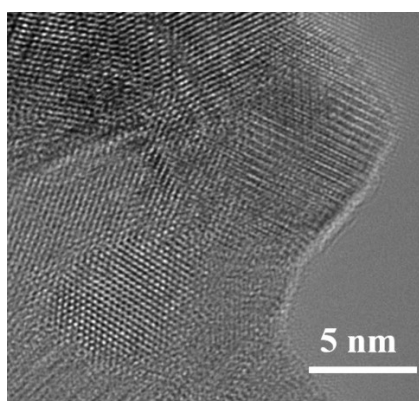

**Fig. S18** HRTEM images of LNMO-0.2 catalysts after durability tests.

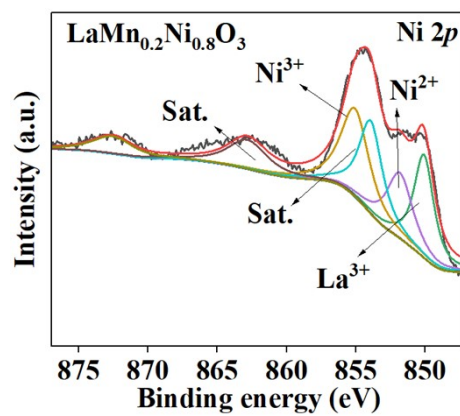

**Fig. S19** XPS images of LNMO-0.2 catalysts after durability tests.



## 2. Table S1 to S2

**Table S1.** The contents of different LNMO metal elements were measured by LCP-MS

|         | wavelength | net intensity | concentration (ppm) | concentration (mmol L <sup>-1</sup> ) | atomic ratio |
|---------|------------|---------------|---------------------|---------------------------------------|--------------|
| $x=0$   | La 408.671 | 1921          | 18.72496133         | 0.134799232                           | 1            |
|         | Mn 257.61  | 35            | 0                   | 0                                     | 0            |
|         | Ni 231.604 | 922           | 7.839203427         | 0.142691824                           | 1.05855072   |
| $x=0.2$ | La 408.671 | 1820          | 17.74317489         | 0.127731444                           | 1            |
|         | Mn 257.61  | 183           | 1.536139822         | 0.027961335                           | 0.21890722   |
|         | Ni 231.604 | 1105          | 6.139000498         | 0.104595105                           | 0.81886732   |
| $x=0.4$ | La 408.671 | 1539          | 15.01167002         | 0.108067598                           | 1            |
|         | Mn 257.61  | 424           | 2.548949537         | 0.04342851                            | 0.4018643    |
|         | Ni 231.604 | 510           | 3.591672067         | 0.065376826                           | 0.60496233   |
| $x=0.6$ | La 408.671 | 1502          | 14.65200568         | 0.105478408                           | 1            |
|         | Mn 257.61  | 699           | 3.689318666         | 0.062857899                           | 0.59593143   |
|         | Ni 231.604 | 280           | 2.363470228         | 0.043020682                           | 0.40786245   |
| $x=0.8$ | La 408.671 | 1326          | 12.9411699          | 0.093162263                           | 1            |
|         | Mn 257.61  | 495           | 4.197243807         | 0.076399647                           | 0.82007075   |
|         | Ni 231.604 | 254           | 1.00432257          | 0.017111454                           | 0.18367366   |

**Table S2.** The UOR performance comparison of different catalysts.

| Electrocatalysts                                     | Electrolyter        | Potential<br>@10mA cm <sup>-2</sup> (V) | Tafel slope<br>(mV dec <sup>-1</sup> ) | Scan rate<br>(mV s <sup>-1</sup> ) |
|------------------------------------------------------|---------------------|-----------------------------------------|----------------------------------------|------------------------------------|
| This work LNMO-0.2                                   | 1 M KOH+0.33 M urea | 1.27                                    | 44.6                                   | 10                                 |
| Co <sub>2</sub> GeO <sub>4</sub>                     | 1 M KOH+0.33 M urea | 1.59                                    | 79                                     | 10                                 |
| CuO@CuM                                              | 1 M KOH+0.5 M urea  | 1.44                                    | 98.7                                   | 5                                  |
| C@NiO                                                | 1 M KOH+0.33 M urea | 1.36                                    | 87.2                                   | 5                                  |
| Co <sub>2</sub> VO <sub>4</sub> /NF                  | 1 M KOH+0.5 M urea  | 1.32                                    | 92                                     | 5                                  |
| Co <sub>3</sub> O <sub>4</sub> /CC                   | 1 M KOH+0.3 M urea  | 1.67                                    | 71                                     | 5                                  |
| MoO <sub>2</sub> @CC                                 | 1 M KOH+0.33 M urea | 1.44                                    | 112.2                                  | 10                                 |
| FeNi @NC                                             | 1 M KOH+0.33 M urea | 1.37                                    | 71.6                                   | 1                                  |
| Co <sub>3</sub> S <sub>4</sub> /CoO <sub>x</sub> NTs | 1 M KOH+0.5 M urea  | 1.4                                     | 91.3                                   | 5                                  |
| FeNi Oxide-3                                         | 1 M KOH+0.33 M urea | 1.49                                    | 124                                    | 1                                  |
| NiAl-LDHs                                            | 1 M KOH+0.33 M urea | 1.42                                    | 59.8                                   | 10                                 |
| Ni@NCNT-3                                            | 1 M KOH+0.5 M urea  | 1.38                                    | 76                                     | 2                                  |
| NF@acid-H <sub>2</sub>                               | 1 M KOH+0.33 M urea | 1.33                                    | 65                                     | 10                                 |
| V-Ni <sub>3</sub> N/NF                               | 1 M KOH+0.5 M urea  | 1.361                                   | 45                                     | -                                  |
| NiCo-BDC-S-6                                         | 1 M KOH+0.33 M urea | 1.326                                   | 46                                     | 5                                  |
| Ni(OH)-S                                             | 1 M KOH+0.33 M urea | 1.34                                    | 53.28                                  | 5                                  |
